# Supplementary material for: Exploring inhomogeneous surfaces: Ti-rich SrTiO3(110) reconstructions via active learning
Source: Royal Society of Chemistry journal article supplement (doi:10.1039/d4dd00231h), 2024-01-01

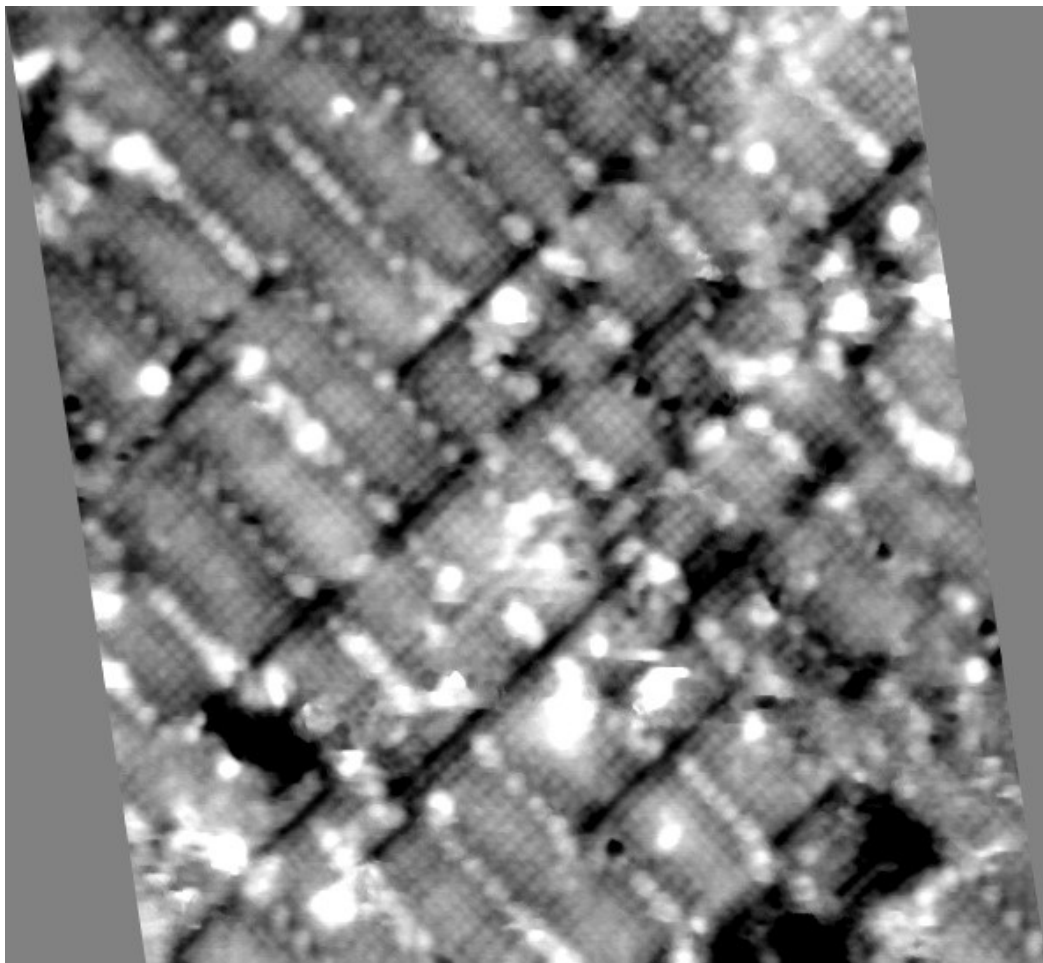

Supplement: d4dd00231h1.pdf [file d4dd00231h1.pdf]
